# Supplementary material for: A novel iodine-mediated tandem cyclization–cycloaddition reaction leading to polyoxacyclic ring systems
Source: Royal Society of Chemistry journal article supplement (doi:10.1039/b910232a), 2009-01-01
Supplement: b910232a_tab.pdf [file b910232a_tab.pdf]

**Table S1** Optimization of the reaction conditions<sup>a</sup>

| Entry    | E <sup>+</sup>       | Solvent                                | Base                           | Time/h    | Yield (%) <sup>b</sup> |
|----------|----------------------|----------------------------------------|--------------------------------|-----------|------------------------|
| 1        | I <sub>2</sub>       | THF                                    | —                              | 24        | Trace                  |
| 2        | I <sub>2</sub>       | CHCl <sub>3</sub>                      | —                              | 24        | 33                     |
| 3        | I <sub>2</sub>       | ClCH <sub>2</sub> CH <sub>2</sub> Cl   | —                              | 24        | 63                     |
| 4        | I <sub>2</sub>       | CH <sub>2</sub> Cl <sub>2</sub>        | —                              | 24        | 75                     |
| 5        | I <sub>2</sub>       | Toluene                                | —                              | 24        | 44                     |
| 6        | I <sub>2</sub>       | Xylene                                 | —                              | 24        | 48                     |
| 7        | I <sub>2</sub>       | ClCH <sub>2</sub> CH <sub>2</sub> Cl   | NaHCO <sub>3</sub>             | 12        | 85                     |
| <b>8</b> | <b>I<sub>2</sub></b> | <b>CH<sub>2</sub>Cl<sub>2</sub></b>    | <b>NaHCO<sub>3</sub></b>       | <b>12</b> | <b>95</b>              |
| 9        | I <sub>2</sub>       | CH <sub>2</sub> Cl <sub>2</sub>        | K <sub>2</sub> CO <sub>3</sub> | 12        | 84                     |
| 10       | I <sub>2</sub>       | CH <sub>2</sub> Cl <sub>2</sub>        | K <sub>3</sub> PO <sub>4</sub> | 12        | 76                     |
| 11       | I <sub>2</sub>       | CH <sub>2</sub> Cl <sub>2</sub>        | KOBu <sup>t</sup>              | 12        | 0                      |
| 12       | I <sub>2</sub>       | CH <sub>2</sub> Cl <sub>2</sub>        | CH <sub>3</sub> ONa            | 12        | 0                      |
| 13       | NIS                  | CH <sub>2</sub> Cl <sub>2</sub>        | NaHCO <sub>3</sub>             | 12        | 0                      |
| 14       | ICl                  | CH <sub>2</sub> Cl <sub>2</sub>        | NaHCO <sub>3</sub>             | 12        | 78                     |
| 15       | I <sub>2</sub>       | CH <sub>2</sub> Cl <sub>2</sub> (dry)  | NaHCO <sub>3</sub>             | 12        | 64                     |
| 16       | I <sub>2</sub>       | CH <sub>2</sub> Cl <sub>2</sub> (5%aq) | NaHCO <sub>3</sub>             | 12        | 66                     |

<sup>a</sup> Reaction conditions: unless indicated otherwise, all reactions were run by employing 0.25 mmol of enynebenzaldehyde, 2 equiv. of electrophile and 2 equiv. of base in 3 mL of solvent stirred at room temperature. <sup>b</sup> Isolated yields.
